# Supplementary material
Source: HighWire-hosted journal article supplement (https://jme.bmj.com/content/jme-2024-110006)
Supplement: inline-supplementary-material-1 [file inline-supplementary-material-1.pdf]

Record ID of the consented patients:

Entry is made by study assistant

## Questionnaire for the patients

### As part of the participation in "Broad Consent in the Emergency Department (BC-ED)"

**Firstly, we would like to ask you questions about your "broad consent", its understanding and its voluntary nature:**

**1. Did you understand everything in the patient information?**

☐ Yes ☐ No

**2. If 'no', what was the reason? (multiple answers possible)**

- ☐ Too much information.
- ☐ Too long.
- ☐ I read too quickly.
- ☐ I'm not particularly interested in the content.
- ☐ The essentials were not clearly presented.
- ☐ I did not understand technical terms.
- ☐ Too little explanation.
- ☐ The language was too difficult.
- ☐ I was too excited.
- ☐ I didn't have enough time.
- ☐ Other: \_\_\_\_\_

**3a. How do you rate the educational talk on the use of your data? (multiple answers possible)**

- ☐ I would have liked a more detailed educational talk.
- ☐ The educational talk could have been shorter.
- ☐ I was given all the necessary information during the educational talk.
- ☐ All my questions were answered during the educational talk.
- ☐ I would have preferred to have been informed by a doctor.
- ☐ Unfortunately, I didn't have enough time to think about it.
- ☐ I had time to think about it and was able to ask all my questions.
- ☐ My questions were answered satisfactorily.
- ☐ I signed everything to finish quickly.
- ☐ Other: \_\_\_\_\_

**3b. Do you currently feel sufficiently informed about the scientific use of patient data?**

- ☐ Yes      ☐ No

**4a. How would you rate the educational talk on the use of your biomaterials? (multiple answers possible)**

- ☐ I would have liked a more detailed educational talk.
- ☐ The educational talk could have been shorter.
- ☐ I was given all the necessary information during the educational talk.
- ☐ All my questions were answered during the educational talk.
- ☐ I would have preferred to have been informed by a doctor.
- ☐ Unfortunately, I didn't have enough time to think about it.
- ☐ I had time to think about it and was able to ask all my questions.
- ☐ My questions were answered satisfactorily.
- ☐ I signed everything to finish quickly.
- ☐ Other: \_\_\_\_\_

**4b. Do you currently feel sufficiently informed about the scientific use of biomaterials?**

- ☐ Yes      ☐ No

**5. What is the reason or motivation for your consent? (multiple answers possible)**

- ☐ General support for research.
- ☐ Help for future patients.
- ☐ Own advantages through research.
- ☐ Feeling of connection with future patients.
- ☐ Gratitude towards the staff providing care.
- ☐ Hope for own advantages.
- ☐ On the recommendation of other people.
- ☐ Fear of poorer treatment if consent is not given.
- ☐ No specific reasons.
- ☐ Other: \_\_\_\_\_

**6. Have you already participated in a study in the field of medical research?**

- ☐ Yes      ☐ No

**7. Has anyone you know well or a member of your family ever taken part in a medical research study?**

- ☐ Yes      ☐ No

**8. Do you work in the healthcare sector?**

- ☐ Yes      ☐ No

**8a. If 'yes', in which area?**

- ☐ Medical doctor.
- ☐ Healthcare professionals (e.g. nurses, therapists, paramedics).
- ☐ Staff not directly involved in patient care (e.g. administrative staff, medical technicians, scientists, IT staff).

**9. Did you have sufficient time to consider the decision to give consent?**

- ☐ Yes      ☐ No

**10a. Did you understand the content of the consent before you decided to give your consent?**

- ☐ Not at all.
- ☐ Rather not.
- ☐ Yes, mostly.
- ☐ Yes, completely.

**10b. Did you feel that the benefits of taking part in this study were explained to you?**

- ☐ Not at all.
- ☐ Rather not.
- ☐ Yes, mostly.
- ☐ Yes, completely.

**10c. Did you feel that the inconveniences and risks of taking part in this study were explained to you?**

- ☐ Not at all.
- ☐ Rather not.
- ☐ Yes, mostly.
- ☐ Yes, completely.

**10d. Did you feel that the trial staff were available and willing to answer any questions or concerns you had about the trial?**

- ☐ Not at all.
- ☐ Rather not.
- ☐ Yes, mostly.
- ☐ Yes, completely.

**10e. Were your questions and concerns answered satisfactorily by the study staff?**

- ☐ Not at all
- ☐ Rather not.
- ☐ Yes, mostly.
- ☐ Yes, completely.

**11. Were your questions and concerns answered satisfactorily by the study staff?****11aI. Patient information**

- ☐ Yes, completely.
- ☐ Partially.
- ☐ Not at all.
- ☐ Not clear.

**11aII. The scope of the written patient information is...**

- ☐ Not detailed enough.
- ☐ Just right.
- ☐ Too detailed.
- ☐ I haven't read it.

**11aIII. Is the content of the written patient information written in an understandable way?**

- ☐ Overall yes.
- ☐ Mostly yes.
- ☐ Mostly no.
- ☐ Overall no.
- ☐ I have not read them.

**11bI. Information video**

- ☐ Yes, completely.
- ☐ Partially.
- ☐ Not at all.
- ☐ Not clear.

**11bII. The scope of the information video is.....**

- ☐ Not detailed enough.
- ☐ Just right.
- ☐ Too detailed.
- ☐ I haven't looked at it.

**11bIII. Is the content of the information video presented clearly?**

- ☐ Overall yes.
- ☐ Mostly yes.
- ☐ Mostly no.
- ☐ Overall no.
- ☐ I didn't watch.

**11c. Other sources of information:** \_\_\_\_\_

**12. Please indicate which modules of the 'Broad Consent' (BC) you have just consented to.**

**12a. Patient data**

- ☐ Current
- ☐ Data already available, 5 years retrospectively

**12b. Health insurance data**

- ☐ Data already available, 5 years retrospectively
- ☐ Data collected in the future, up to a further 5 years

**12c. Biomaterial**

- ☐ Current
- ☐ Samples already taken, 5 years retrospectively

**12d. Recontacting**

- ☐ For further questions
- ☐ Information about additional medical findings

**12e. I have not agreed to any of the modules because... (multiple answers possible):**

- ☐ I have not had enough time to think about it.
- ☐ I am generally not interested in donating data.
- ☐ I have concerns about privacy.
- ☐ I did not want to make this decision in the stressful medical situation of my emergency department stay.
- ☐ Other: \_\_\_\_\_

**13. If you have consented to share data relating to your current emergency department treatment, which data will this specifically include?**

- ☐ Data on my treatment in the emergency department **without** data from the possible subsequent inpatient stay.
- ☐ Data on my treatment in the emergency department **and** data from the possible subsequent inpatient stay.
- ☐ I do not know.

**14. Please use the space below to formulate your further comments on the BC or the BC-information process:**

---

---

Part two follows on the next page.

**In the second part, we would like to collect a few more details about you:**

**S1. Age:** \_\_\_\_\_

**S2. Gender:**

- ☐ Female
- ☐ Male
- ☐ Other (Please specify your gender yourself):  
\_\_\_\_\_
- ☐ I prefer not to answer

**S3. What gender were you assigned at birth?**

- ☐ Female
- ☐ Male
- ☐ Other
- ☐ I prefer not to answer

**S4. Country of birth**

- ☐ Germany
- ☐ EU country  
If 'yes', which one: \_\_\_\_\_
- ☐ Non-EU country  
If 'yes', which one: \_\_\_\_\_

**S5a. Which language do you prefer?**

\_\_\_\_\_

- ☐ I prefer not to answer

**S5b. How well do you consider yourself to speak German?**

- ☐ Mother language
- ☐ Fluent
- ☐ Good knowledge
- ☐ A little
- ☐ I prefer not to answer

**S6. What is your highest school-leaving qualification?**

- ☐ A-levels, general higher education entrance qualification
- ☐ Advanced technical college entrance qualification, specialised secondary school entrance qualification
- ☐ Intermediate school leaving certificate
- ☐ Secondary/elementary school
- ☐ Finished school without leaving certificate
- ☐ Other qualification (e.g. obtained abroad)
- ☐ I prefer not to answer

**S7. What is your highest educational qualification?**

- ☐ University
- ☐ University of applied sciences, engineering school
- ☐ Technical school (vocational or technical
- ☐ Apprenticeship (vocational training)
- ☐ No qualification or still in vocational training
- ☐ Other educational qualification
- ☐ I prefer not to answer

**S8. Are you currently...**

- ☐ in full-time employment
- ☐ in part-time employment
- ☐ Self-employed
- ☐ Occasionally or irregularly employed
- ☐ On parental leave / maternity leave
- ☐ Pupil and student
- ☐ Not employed
- ☐ Retired, pensioner, early retiree
- ☐ I prefer not to answer

**S9. How many people live in your household, including you?**

- ☐ Total number of people living in the household: \_\_\_\_\_
- ☐ I prefer not to answer

**S10. How many people in your household are under the age of 14?**

\_\_\_\_\_



**S11. Are you the main earner in your household?**

- ☐ Yes
- ☐ No
- ☐ I don't have an answer for that
- ☐ I prefer not to answer

**S12. What is the total monthly net income of your household?**

- ☐ Above 2500 Euro
- ☐ About 2500 Euro
- ☐ Below 2500 Euro
- ☐ I prefer not to answer

**S13. Do you have a nursing care level?**

- |                          |                          |                          |                          |                          |                          |
|--------------------------|--------------------------|--------------------------|--------------------------|--------------------------|--------------------------|
| 1                        | 2                        | 3                        | 4                        | 5                        | No                       |
| <input type="checkbox"/> |
- ☐ I prefer not to answer

**S14. What is your current marital status?**

- ☐ Single
- ☐ Divorced
- ☐ Married (living together)
- ☐ Married (living apart)
- ☐ Registered partnership (living together)
- ☐ Registered partnership (living apart)
- ☐ Widowed
- ☐ I prefer not to answer

**S15. How do you identify yourself?**

- ☐ Queer
- ☐ Lesbian
- ☐ Gay
- ☐ Bisexual
- ☐ Heterosexual
- ☐ Other sexuality
- ☐ I prefer not to answer

**S16. Where do you currently live?**

- ☐ In an apartment or house (owned, rented or with relatives)
- ☐ Assisted living (e.g. retirement apartments, retirement homes, senior residences, senior-friendly living)
- ☐ Inpatient care
- ☐ Refugee accommodation
- ☐ No permanent residence
- ☐ I prefer not to answer
- ☐ Other: \_\_\_\_\_

**Thank you very much for your participation in this survey.**

**If you have any questions or queries, please do not hesitate to contact the study team, who will be happy to assist you.**
